# Supplementary material
Source: publisher figshare collection journal article supplement (https://aacr.figshare.com/articles/dataset/_/22472780)
Supplement: Supplementary file 1 [file 39924284]

**Supplementary Table S2.** Adverse events (regardless of relationship to study drug) by preferred term in ≥10% of patients in total phase 1 population

| <b>AE<sup>a</sup></b>                         | <b>15 mg:<br/>PiB<br/>(n=3)</b> | <b>30 mg:<br/>PiB<br/>(n=3)</b> | <b>60 mg:<br/>PiB<br/>(n=4)</b> | <b>120<br/>mg:<br/>PiB<br/>(n=3)</b> | <b>180<br/>mg:<br/>PiB<br/>(n=3)</b> | <b>180 mg:<br/>Cap<br/>(n=14)</b> | <b>180 mg:<br/>PiB +<br/>Cap<br/>(total:<br/>n=17)</b> | <b>270<br/>mg:<br/>Cap<br/>(n=6)</b> | <b>210<br/>mg:<br/>Cap<br/>(n=9)</b> | <b>Phase 1<br/>total<br/>(N=45)</b> |
|-----------------------------------------------|---------------------------------|---------------------------------|---------------------------------|--------------------------------------|--------------------------------------|-----------------------------------|--------------------------------------------------------|--------------------------------------|--------------------------------------|-------------------------------------|
| Total treatment-emergent AEs, n               | 17                              | 13                              | 23                              | 21                                   | 19                                   | 110                               | 129                                                    | 59                                   | 149                                  | 411                                 |
| Patients with ≥1 treatment-emergent AE, n (%) | 3 (100)                         | 3 (100)                         | 4 (100)                         | 3 (100)                              | 3 (100)                              | 14 (100)                          | 17 (100)                                               | 6 (100)                              | 9 (100)                              | 45 (100)                            |
| Fatigue                                       | 0                               | 1 (33)                          | 2 (50)                          | 0                                    | 0                                    | 4 (29)                            | 4 (24)                                                 | 2 (33)                               | 6 (67)                               | 15 (33)                             |
| Vomiting                                      | 3 (100)                         | 0                               | 1 (25)                          | 1 (33)                               | 1 (33)                               | 3 (21)                            | 4 (24)                                                 | 2 (33)                               | 3 (33)                               | 14 (31)                             |
| Nausea                                        | 1 (33)                          | 0                               | 2 (50)                          | 0                                    | 0                                    | 2 (14)                            | 2 (12)                                                 | 2 (33)                               | 5 (56)                               | 12 (27)                             |
| Anemia                                        | 1 (33)                          | 0                               | 1 (25)                          | 0                                    | 0                                    | 4 (29)                            | 4 (24)                                                 | 2 (33)                               | 2 (22)                               | 10 (22)                             |
| Pruritus                                      | 0                               | 0                               | 1 (25)                          | 2 (67)                               | 0                                    | 4 (29)                            | 4 (24)                                                 | 0                                    | 3 (33)                               | 10 (22)                             |
| Decreased appetite                            | 0                               | 1 (33)                          | 1 (25)                          | 0                                    | 0                                    | 3 (21)                            | 3 (18)                                                 | 0                                    | 4 (44)                               | 9 (20)                              |
| Peripheral edema                              | 0                               | 0                               | 2 (50)                          | 0                                    | 0                                    | 2 (14)                            | 2 (12)                                                 | 1 (17)                               | 2 (22)                               | 7 (16)                              |
| Maculopapular rash                            | 0                               | 0                               | 0                               | 1 (33)                               | 0                                    | 3 (21)                            | 3 (18)                                                 | 3 (50)                               | 0                                    | 7 (16)                              |
| Cough                                         | 0                               | 0                               | 2 (50)                          | 1 (33)                               | 0                                    | 1 (7)                             | 1 (6)                                                  | 1 (17)                               | 1 (11)                               | 6 (13)                              |
| Diarrhea                                      | 1 (33)                          | 1 (33)                          | 0                               | 0                                    | 1 (33)                               | 1 (7)                             | 2 (12)                                                 | 0                                    | 2 (22)                               | 6 (13)                              |
| Dyspnea                                       | 0                               | 0                               | 0                               | 0                                    | 1 (33)                               | 3 (21)                            | 4 (24)                                                 | 0                                    | 2 (22)                               | 6 (13)                              |
| Increased lipase                              | 0                               | 0                               | 1 (25)                          | 0                                    | 0                                    | 0                                 | 0                                                      | 2 (33)                               | 3 (33)                               | 6 (13)                              |
| Back pain                                     | 0                               | 0                               | 0                               | 0                                    | 1 (33)                               | 1 (7)                             | 2 (12)                                                 | 1 (17)                               | 2 (22)                               | 5 (11)                              |
| Headache                                      | 1 (33)                          | 0                               | 1 (25)                          | 0                                    | 0                                    | 2 (14)                            | 2 (12)                                                 | 0                                    | 1 (11)                               | 5 (11)                              |
| Hypotension                                   | 0                               | 0                               | 0                               | 0                                    | 0                                    | 3 (21)                            | 3 (18)                                                 | 0                                    | 2 (22)                               | 5 (11)                              |
| Lymphopenia                                   | 1 (33)                          | 1 (33)                          | 0                               | 1 (33)                               | 0                                    | 0                                 | 0                                                      | 2 (33)                               | 0                                    | 5 (11)                              |
| Oropharyngeal pain                            | 0                               | 0                               | 1 (25)                          | 1 (33)                               | 0                                    | 1 (7)                             | 1 (6)                                                  | 0                                    | 2 (22)                               | 5 (11)                              |
| Stomatitis                                    | 0                               | 0                               | 0                               | 2 (67)                               | 0                                    | 1 (7)                             | 1 (6)                                                  | 2 (33)                               | 0                                    | 5 (11)                              |

<sup>a</sup>Patients are counted only once for each AE preferred term. Cap, capsule.
